# Supplementary material for: Correlation between NDVI and PM2.5 Concentrations in a Small-Scale Urban Area
Source: Research Square preprint supplement (doi:10.21203/rs.3.rs-3146587/v1), 2023-09-01
Supplement: Supplementary file 1 [file 31ddf5c40551d8ef57c867e7.docx]

Highlights (Correlation between NDVI and PM2.5 Concentrations in a Small-Scale Urban Area)

- The main research objective of this paper is to explore whether green space in densely populated urban areas can have an effective impact on PM2.5 concentration, and to study the temporal and spatial regularity and mathematical relationship between NDVI and PM2.5
- This paper collects the PM2.5 data of typical months in Nanjing, parameterizes the NDVI images of the corresponding regions by using "PIE-Engine" and "Matlab", and then uses linear regression analysis and one-way ANOVA to test whether there is a significant correlation between the two factors.
- No matter in spring or winter, the PM2.5 concentration in the main urban area of Nanjing is significantly higher than that in the suburbs. The higher NDVI in each study area, the lower the PM2.5 concentration in the region, and the correlation between the two is 0.89 on average (1 being a complete correlation), indicating that respiratory health can be improved by increasing green space and improving green space quality in densely populated downtown areas. It is possible to reduce the risk of transmission of various viruses.
- In seasons or places with high PM2.5 concentration, the influ-ence of greening status on PM2.5 becomes more obvious, that is to say, the higher the PM2.5 concentration, the greater the ecological efficiency of the urban green space
- The NDVI value was significantly negatively correlated with the average and peak value of PM2.5 in the corresponding region, with overall correlation coefficients of −0.89 and −0.928, respectively. There was a significant positive correlation between the average concentration of PM2.5 and the peak value of PM2.5, with a correlation coefficient of 0.869. In addition, unitary linear regression analysis showed that the NDVI value, average PM2.5 value, and peak value showed a simple linear regression. Taking the NDVI value as the independent variable(x), and taking the average PM2.5 value(Y1) and peak PM2.5 value as the dependent variable , the regression equations were Y1 = 56.3 − 0.088x and Y2 = 83.2 − 0.09x.
